# Supplementary material for: Signaling cascades transmit information downstream and upstream but unlikely simultaneously
Source: PubMed Central journal article supplement (PMC5000522; doi:10.1186/s12918-016-0303-2), 2016-08-25
Supplement: 12918_2016_303_MOESM1_ESM.pdf [file 12918_2016_303_MOESM1_ESM.pdf]

# Additional File 1

## The inverse iterative map

The inverse map:

$$\begin{aligned}x_2 &= \check{g}_1(s, x_1) \\x_{i+1} &= g_i(x_{i-1}, x_i), \quad 1 \leq i \leq n \\d_T &= \hat{g}_n(x_n, x_{n-1}).\end{aligned}$$

Explicitly we have:

$$\begin{aligned}x_2 &= \frac{a_2 \left\{ \left( s - \frac{x_1}{x_1+a_1} \right) ((x_1 + a_1)(1 - x_1) - c_1 x_1) - b_1 x_1 \right\}}{\left( s - \frac{x_1}{x_1+a_1} \right) ((x_1 + a_1)(-1 + x_1 + e_2) + c_1 x_1) + b_1 x_1}, \\x_{i+1} &= \frac{a_{i+1} \{ x_{i-1} ((x_i + a_i)(1 - x_i) - c_i x_i) - b_i e_i x_i \}}{x_{i-1} ((x_i + a_i)(-1 + x_i + e_{i+1}) + c_i x_i) + b_i e_i x_i}, \quad 1 < i < n, \\d_T &= \frac{(x_n + a_n) \{ x_{n-1} ((x_n + a_n)(1 - x_n) - c_n x_n) - b_n e_n x_n \}}{x_{n-1} x_n (x_n + a_n)}.\end{aligned}$$

By setting  $x_0 = 1 - \frac{x_1}{s(x_1+a_1)}$ , we can write  $\check{g}_1(s, x_1) = g_1(x_0, x_1)$ .
